# Supplementary material for: Bacterial Isolate Inhabiting Spitsbergen Soil Modifies the Physiological Response of Phaseolus coccineus in Control Conditions and under Exogenous Application of Methyl Jasmonate and Copper Excess
Source: PubMed Central journal article supplement (PMC6514558; doi:10.3390/ijms20081909), 2019-04-17
Supplement: ijms-20-01909-s001.pdf [file ijms-20-01909-s001.pdf]

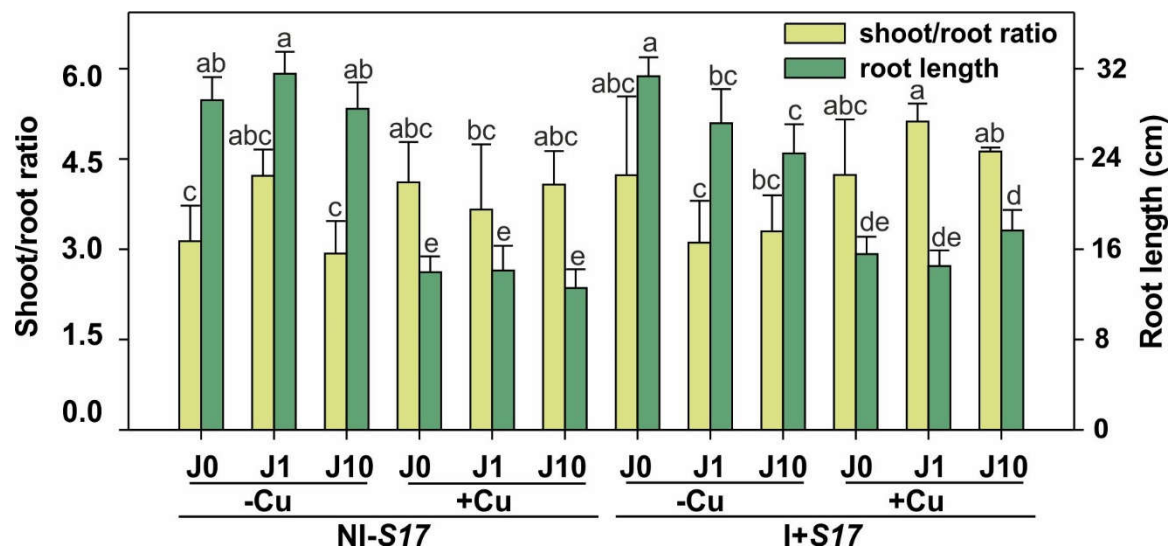

**Supplementary Figure S1.** Biometric parameters of *Phaseolus coccineus* shoots and roots: shoot-to-root ratio and root length. Data are means  $\pm$  SD ( $n = 30$ ). Values for shoots and roots followed by the same letter are not significantly different ( $p < 0.05$ ; Tukey's test). Abbreviations: J0 = without methyl jasmonate (J), J1 = with 1  $\mu\text{M}$  of J, J10 = with 10  $\mu\text{M}$  of J; -Cu = without Cu, +Cu = with 50  $\mu\text{M}$  Cu; NI - S17 = no inoculation with the S17 isolate, I + S17 = inoculation with the S17 isolate.

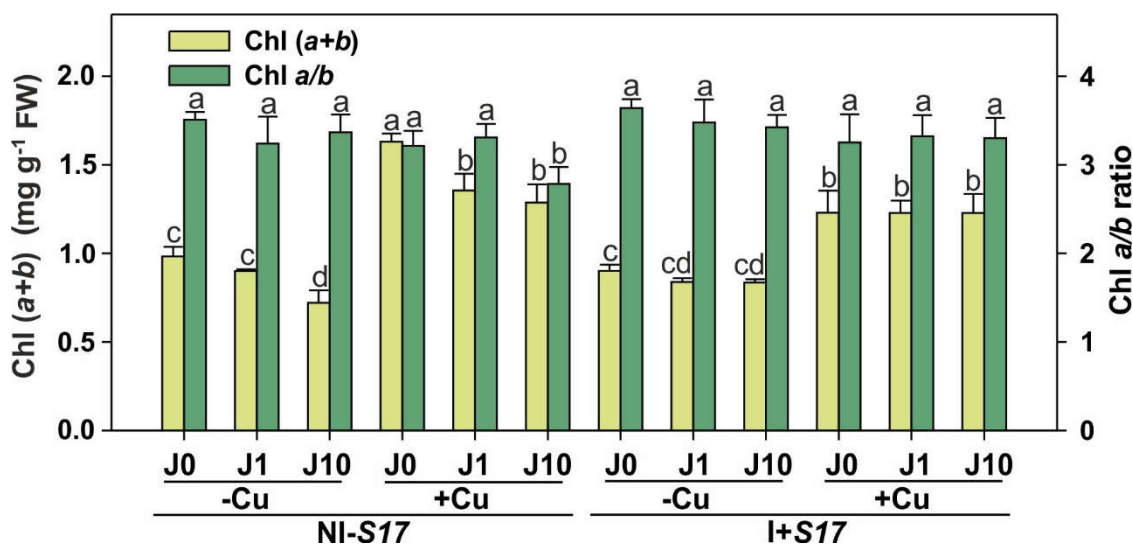

**Supplementary Figure S2.** Ratios of photosynthetic pigments in *Phaseolus coccineus* leaves: sum of chlorophylls (Chl  $a+b$ ) and chlorophyll  $a$  to  $b$  ratio (Chl  $a/b$ ). Data are means  $\pm$  SD ( $n = 3$ ). Values followed by the same letter are not significantly different ( $p < 0.05$ ; Tukey's test). Abbreviations: J0 = without methyl jasmonate (J), J1 = with 1  $\mu\text{M}$  of J, J10 = with 10  $\mu\text{M}$  of J; -Cu = without Cu, +Cu = with 50  $\mu\text{M}$  Cu; NI - S17 = no inoculation with the S17 isolate, I + S17 = inoculation with the S17 isolate, FW = fresh weight, Chl = chlorophyll.

**Supplementary Table S1.** Results of the multivariate analysis of variance by three-way ANOVA for biomass data, and concentration of photosynthetic pigments and elements. The variables were tested with the following factors: bacterial isolate S17 (S17), Cu, and methyl jasmonate (J). F-value with the level of significance ( $p < 0.001$  – \*\*\*;  $p < 0.01$  – \*\*;  $p < 0.05$  – \*) were presented. Abbreviations: FW = fresh weight, Chl *a* = chlorophyll *a*, Chl *b* = chlorophyll *b*, Car = carotenoids.

| Source of variation | Shoot FW |     | Root FW |     | Shoot/Root ratio |     | Root length |     | Chl <i>a</i> |     | Chl <i>b</i> |     | Car   |     | Chl ( <i>a+b</i> ) /Car |     | Chl ( <i>a+b</i> ) |     | Chl <i>a/b</i> |     |
|---------------------|----------|-----|---------|-----|------------------|-----|-------------|-----|--------------|-----|--------------|-----|-------|-----|-------------------------|-----|--------------------|-----|----------------|-----|
|                     | F        | p   | F       | p   | F                | p   | F           | p   | F            | p   | F            | p   | F     | p   | F                       | p   | F                  | p   | F              | p   |
| S17                 | 0.3      | *** | 1.9     | ns  | 6.3              | *   | 0.1         | ns  | 16.8         | *** | 41.5         | *** | 12.7  | *** | 2.2                     | ns  | 25.5               | *** | 9.8            | **  |
| Cu                  | 235.0    | *** | 294.8   | *** | 24.3             | *** | 1123.0      | *** | 451.0        | *** | 551.5        | *** | 348.3 | *** | 38.6                    | *** | 553.9              | *** | 20.9           | *** |
| J                   | 0.8      | ns  | 1.9     | ns  | 1.1              | ns  | 5.9         | **  | 23.7         | *** | 9.1          | *** | 77.2  | *** | 19.1                    | *** | 22.6               | *** | 4.1            | *   |
| S17×Cu              | 6.2      | **  | 1.5     | ns  | 3.2              | ns  | 28.4        | *** | 17.9         | *** | 27.2         | *** | 22.3  | *** | 0.1                     | ns  | 23.3               | *** | 0.2            | ns  |
| S17×J               | 5.8      | *   | 3.4     | *   | 0.6              | ns  | 7.3         | **  | 14.8         | *** | 6.1          | **  | 17.1  | *** | 0.1                     | ns  | 14.2               | *** | 1.3            | ns  |
| Cu×J                | 2.2      | ns  | 0.5     | ns  | 1.8              | ns  | 10.0        | *** | 0.4          | *** | 6.0          | **  | 12.3  | *** | 16.2                    | *** | 1.3                | ns  | 3.6            | *   |
| S17×Cu×J            | 9.2      | *** | 2.0     | ns  | 10.0             | *** | 11.1        | *** | 3.5          | *** | 5.1          | **  | 42.4  | *** | 17.9                    | *** | 3.8                | *   | 4.1            | *   |

| Source of variation | C    |     | N    |     | C/N ratio |     |       |     | K     |     | P    |     |       |     |      |     |       |     |       |     |
|---------------------|------|-----|------|-----|-----------|-----|-------|-----|-------|-----|------|-----|-------|-----|------|-----|-------|-----|-------|-----|
|                     | Leaf |     | Root |     | Leaf      |     | Root  |     | Leaf  |     | Root |     | Leaf  |     | Root |     |       |     |       |     |
|                     | F    | p   | F    | p   | F         | p   | F     | p   | F     | p   | F    | p   | F     | p   | F    | p   |       |     |       |     |
| S17                 | 0.1  | ns  | 4.3  | *   | 5.5       | *   | 145.6 | *** | 5.4   | *   | 65.2 | *** | 62.7  | *** | 0.5  | ns  | 70.1  | *** | 147.8 | *** |
| Cu                  | 32.0 | *** | 18.3 | *** | 113.8     | *** | 47.5  | *** | 214.9 | *** | 0.1  | ns  | 26.4  | *** | 5.1  | *   | 2.2   | ns  | 247.7 | *** |
| J                   | 2.6  | ns  | 8.5  | **  | 0.0       | ns  | 136.1 | *** | 3.4   | *   | 61.8 | *** | 114.4 | *** | 5.3  | *   | 0.8   | ns  | 317.2 | *** |
| S17×Cu              | 0.1  | ns  | 9.1  | **  | 0.1       | ns  | 26.9  | *** | 1.1   | ns  | 0.1  | ns  | 48.7  | *** | 6.6  | *   | 8.6   | **  | 227.9 | *** |
| S17×J               | 0.8  | ns  | 0.3  | ns  | 5.3       | *   | 81.9  | *** | 3.2   | ns  | 11.2 | *** | 53.6  | *** | 1.3  | ns  | 80.0  | *** | 473.5 | *** |
| Cu×J                | 3.0  | ns  | 6.4  | **  | 2.4       | ns  | 29.6  | *** | 8.8   | **  | 8.1  | **  | 10.0  | *** | 16.8 | *** | 67.1  | *** | 132.0 | *** |
| S17×Cu×J            | 0.6  | ns  | 9.1  | **  | 10.8      | *** | 81.4  | *** | 3.3   | ns  | 55.9 | *** | 8.2   | **  | 4.1  | *   | 140.2 | *** | 155.6 | *** |

| Source of variation | Fe    |     | Mn    |     | Zn     |     | Mo     |     | Cu    |     |       |     |       |     |      |     |        |     |        |     |
|---------------------|-------|-----|-------|-----|--------|-----|--------|-----|-------|-----|-------|-----|-------|-----|------|-----|--------|-----|--------|-----|
|                     | Leaf  |     | Root  |     | Leaf   |     | Root   |     | Leaf  |     | Root  |     | Leaf  |     | Root |     |        |     |        |     |
|                     | F     | p   | F     | p   | F      | p   | F      | p   | F     | p   | F     | p   | F     | p   | F    | p   |        |     |        |     |
| S17                 | 109.0 | *** | 1.9   | ns  | 1.4    | ns  | 142.7  | *** | 53.6  | *** | 272.6 | *** | 53.4  | *** | 33.1 | *** | 0.5    | ns  | 7.8    | *   |
| Cu                  | 786.2 | *** | 41.9  | *** | 1644.8 | *** | 2368.0 | *** | 137.8 | *** | 232.3 | *** | 983.4 | *** | 5.9  | *   | 1435.4 | *** | 5225.2 | *** |
| J                   | 54.0  | *** | 157.0 | *** | 11.4   | *** | 262.9  | *** | 153.3 | *** | 246.0 | *** | 158.6 | *** | 61.7 | *** | 12.5   | *** | 4.3    | *   |
| S17×Cu              | 58.2  | *** | 173.4 | *** | 16.6   | *** | 63.4   | *** | 225.5 | *** | 127.7 | *** | 15.7  | *** | 18.7 | *** | 6.8    | *   | 5.0    | *   |
| S17×J               | 15.1  | *** | 24.7  | *** | 8.3    | **  | 6.2    | **  | 21.8  | *** | 173.6 | *** | 154.1 | *** | 97.1 | *** | 3.2    | ns  | 0.0    | ns  |
| Cu×J                | 144.3 | *** | 50.9  | *** | 29.1   | *** | 182.2  | *** | 55.0  | *** | 82.2  | *** | 36.3  | *** | 7.1  | **  | 24.2   | *** | 1.7    | ns  |
| S17×Cu×J            | 11.2  | *** | 16.0  | *** | 2.1    | ns  | 6.1    | *** | 192.0 | *** | 51.9  | *** | 241.4 | *** | 3.7  | *   | 5.2    | *** | 0.3    | ns  |

**Supplementary Table S2** Results of the multivariate analysis of variance by three-way ANOVA for concentration of total flavonoids (FLAVO) and total phenolic compounds (TPC), antioxidant capacity, and enzymes activity. The variables were tested with the following factors: bacterial isolate S17 (S17), Cu, and methyl jasmonate (J). F-value with the level of significance ( $p < 0.001$  – \*\*\*;  $p < 0.01$  – \*\*;  $p < 0.05$  – \*) were presented. Abbreviations: ABTS = 2-azino-bis-3-ethylbenzthiazoline-6-sulphonic acid, DPPH = 2,2-diphenyl-1-picrylhydrazyl, SOD = superoxide dismutase, CAT = catalase, APX = ascorbate peroxidase, GPX = guaiacol peroxidase, PAL = phenylalanine ammonia-lyase, TAL = tyrosine ammonia-lyase, GLU =  $\beta$ -1,3-glucanase.

| Source of variation | FLAVO |     |        |     | TPC   |     |        |     | ABTS  |     |        |     | DPPH  |     |        |     |
|---------------------|-------|-----|--------|-----|-------|-----|--------|-----|-------|-----|--------|-----|-------|-----|--------|-----|
|                     | Leaf  |     | Root   |     | Leaf  |     | Root   |     | Leaf  |     | Root   |     | Leaf  |     | Root   |     |
|                     | F     | p   | F      | p   | F     | p   | F      | p   | F     | p   | F      | p   | F     | p   | F      | p   |
| S17                 | 42,4  | *** | 5,7    | *   | 4,4   | *** | 0,0    | ns  | 0,7   | ns  | 16,8   | *** | 30,9  | *** | 74,7   | *** |
| Cu                  | 481,2 | *** | 1590,3 | *** | 757,7 | *** | 1803,0 | *** | 394,2 | *** | 3268,7 | *** | 478,9 | *** | 1604,1 | *** |
| J                   | 16,0  | *** | 15,0   | *** | 12,0  | *** | 3,0    | ns  | 17,5  | *** | 13,7   | *** | 53,2  | *** | 0,7    | ns  |
| S17×Cu              | 90,3  | *** | 9,9    | **  | 12,9  | *** | 13,0   | *** | 19,2  | *** | 23,1   | *** | 0,1   | ns  | 83,3   | *** |
| S17×J               | 26,4  | *** | 21,4   | *** | 41,9  | *** | 14,9   | *** | 7,8   | **  | 34,3   | *** | 94,0  | *** | 64,0   | *** |
| Cu×J                | 65,4  | *** | 38,5   | *** | 44,9  | *** | 14,2   | *** | 61,8  | *** | 0,2    | ns  | 49,7  | *** | 0,8    | *** |
| S17×Cu×J            | 8,5   | **  | 43,6   | *** | 14,3  | *** | 13,9   | *** | 6,8   | **  | 18,8   | *** | 14,3  | *** | 44,6   | *** |

| Source of variation | SOD   |     |       |     | CAT   |     |       |     | APX   |     |       |     | GPX  |     |        |     |
|---------------------|-------|-----|-------|-----|-------|-----|-------|-----|-------|-----|-------|-----|------|-----|--------|-----|
|                     | Leaf  |     | Root  |     | Leaf  |     | Root  |     | Leaf  |     | Root  |     | Leaf |     | Root   |     |
|                     | F     | p   | F     | p   | F     | p   | F     | p   | F     | p   | F     | p   | F    | p   | F      | p   |
| S17                 | 23.8  | *** | 322.5 | *** | 59.4  | *** | 56.3  | *** | 46.3  | *** | 255.3 | *** | 17.9 | *** | 216.2  | *** |
| Cu                  | 5.5   | *   | 145.5 | *** | 321.7 | *** | 33.2  | *** | 127.8 | *** | 895.9 | *** | 0.1  | ns  | 1014.7 | *** |
| J                   | 412.4 | *** | 72.0  | *** | 250.2 | *** | 166.7 | *** | 34.3  | *** | 94.2  | *** | 4.9  | *   | 135.4  | *** |
| S17×Cu              | 414.0 | *** | 380.2 | *** | 70.6  | *** | 110.4 | *** | 56.6  | *** | 43.0  | *** | 2.9  | ns  | 104.6  | *** |
| S17×J               | 102.3 | *** | 258.1 | *** | 92.9  | *** | 450.5 | *** | 89.9  | *** | 116.5 | *** | 14.1 | *** | 521.2  | *** |
| Cu×J                | 106.8 | *** | 68.1  | *** | 253.9 | *** | 34.3  | *** | 1.9   | ns  | 399.0 | *** | 0.5  | ns  | 99.0   | *** |
| S17×Cu×J            | 178.6 | *** | 43.0  | *** | 31.1  | *** | 133.8 | *** | 18.8  | *** | 594.0 | *** | 0.7  | ns  | 353.9  | *** |

| Source of variation | PAL   |     |      |     | TAL  |     |      |     | GLU   |     |       |     |
|---------------------|-------|-----|------|-----|------|-----|------|-----|-------|-----|-------|-----|
|                     | Leaf  |     | Root |     | Leaf |     | Root |     | Leaf  |     | Root  |     |
|                     | F     | p   | F    | p   | F    | p   | F    | p   | F     | p   | F     | p   |
| S17                 | 315.2 | *** | 34.4 | *** | 40.1 | *** | 65.9 | *** | 1.5   | ns  | 760.8 | *** |
| Cu                  | 17.6  | *** | 2.8  | ns  | 0.7  | ns  | 3.1  | ns  | 14.1  | *** | 5.8   | *   |
| J                   | 32.2  | *** | 27.7 | *** | 24.4 | *** | 19.6 | *** | 125.2 | *** | 6.6   | **  |
| S17×Cu              | 44.4  | *** | 18.5 | *** | 25.2 | *** | 9.8  | **  | 0.0   | ns  | 3.3   | ns  |
| S17×J               | 96.2  | *** | 0.4  | ns  | 4.0  | *   | 1.0  | ns  | 93.4  | *** | 50.5  | *** |
| Cu×J                | 386.7 | *** | 46.7 | *** | 20.8 | *** | 19.4 | *** | 89.6  | *** | 4.9   | *   |
| S17×Cu×J            | 185.6 | *** | 5.6  | **  | 70.9 | *** | 1.8  | ns  | 1.5   | ns  | 43.4  | *** |

**Supplementary Table S3.** Results of the multivariate analysis of variance by three-way ANOVA for concentration of allantoin (ALLA) and low molecular weight organic acids (LMWOAs). The variables were tested with the following factors: bacterial isolate S17 (S17), Cu, and methyl jasmonate (J). F-value with the level of significance ( $p < 0.001$  – \*\*\*,  $p < 0.01$  – \*\*,  $p < 0.05$  – \*) were presented.

| Source of variation | ALLA  |     |       |     | Tartrate |     |       |     | Malate |     |       |     | Citrate |     |       |     | Succinate |     |      |     |
|---------------------|-------|-----|-------|-----|----------|-----|-------|-----|--------|-----|-------|-----|---------|-----|-------|-----|-----------|-----|------|-----|
|                     | Leaf  |     | Root  |     | Leaf     |     | Root  |     | Leaf   |     | Root  |     | Leaf    |     | Root  |     | Leaf      |     | Root |     |
|                     | F     | p   | F     | p   | F        | p   | F     | p   | F      | p   | F     | p   | F       | p   | F     | p   | F         | p   | F    | p   |
| S17                 | 82.8  | *** | 340.5 | *** | 186.6    | *** | 13.9  | *** | 135.3  | *** | 156.9 | *** | 133.1   | *** | 20.5  | *** | 23.8      | *** | 10.7 | *** |
| Cu                  | 152.9 | *** | 27.9  | *** | 10.9     | **  | 0.0   | *** | 134.6  | *** | 94.7  | *** | 162.8   | *** | 440.3 | *** | 16.7      | *** | 35.2 | *** |
| J                   | 86.3  | *** | 328.4 | *** | 9.1      | **  | 7.1   | *** | 95.9   | *** | 30.7  | *** | 81.4    | *** | 66.5  | *** | 114.8     | *** | 7.4  | **  |
| S17×Cu              | 8.8   | **  | 11.9  | **  | 4.3      | *   | 1.5   | *** | 31.8   | *** | 312.4 | *** | 9.7     | **  | 105.1 | *** | 2.0       | ns  | 85.3 | *** |
| S17×J               | 0.1   | ns  | 315.1 | *** | 6.7      | **  | 9.1   | *** | 23.5   | *** | 17.7  | *** | 26.7    | *** | 85.1  | *** | 1.1       | ns  | 8.8  | **  |
| Cu×J                | 238.8 | *** | 100.1 | *** | 53.1     | *** | 19.2  | *** | 115.2  | *** | 332.8 | *** | 63.9    | *** | 137.9 | *** | 61.3      | *** | 39.1 | *** |
| S17×Cu×J            | 138.0 | *** | 36.4  | *** | 30.2     | *** | 142.4 | *** | 16.4   | *** | 232.2 | *** | 7.1     | **  | 203.9 | *** | 1.6       | ns  | 68.7 | *** |
